1 **Title:** Genomics-informed insights into microbial degradation of *N,N*-dimethylformamide

2 **Running Title:** Microbial degradation of DMF

3

4 Junhui Li<sup>a,b,\*</sup>, Paul Dijkstra<sup>b,c</sup>, Qihong Lu<sup>d</sup>, Shanquan Wang<sup>d</sup>, Shaohua Chen<sup>e</sup>, Deqiang Li<sup>f</sup>, Zhiheng  
5 Wang<sup>g</sup>, Zhenglei Jia<sup>h,\*</sup>, Lu Wang<sup>i,\*</sup>, Hojae Shim<sup>j,\*</sup>

6

7 <sup>a</sup> Vanderbilt Microbiome Initiative, Department of Biological Sciences, Vanderbilt University,  
8 Nashville, TN 37235, USA

9 <sup>b</sup> Center for Ecosystem Science and Society, Northern Arizona University, Flagstaff, AZ 86011, USA

10 <sup>c</sup> Department of Biological Sciences, Northern Arizona University, Flagstaff, AZ 86011, USA

11 <sup>d</sup> Environmental Microbiomics Research Center, School of Environmental Science and Engineering,  
12 Guangdong Provincial Key Laboratory of Environmental Pollution Control and Remediation  
13 Technology, Southern Marine Science and Engineering Guangdong Laboratory (Zhuhai), Sun  
14 Yat-Sen University, Guangzhou, 510275, China

15 <sup>e</sup> Guangdong Laboratory for Lingnan Modern Agriculture, Integrative Microbiology Research Center,  
16 South China Agricultural University, Guangzhou 510642, China

17 <sup>f</sup> Department of Pharmacy, The Second Hospital of Hebei Medical University, Shijiazhuang, 050000,  
18 China

19 <sup>g</sup> The Sixth Geological Brigade, Hebei Bureau of Geology and Mineral Resources Exploration,  
20 Shijiazhuang 050000, China

21 <sup>h</sup> Pearl River Water Resources Research Institute, Guangzhou 510611, China

22 <sup>i</sup> Guangdong Province Key Laboratory for Land Use and Consolidation, South China Agricultural  
23 University, Guangzhou 510642, China

24 <sup>j</sup> Department of Civil and Environmental Engineering, Faculty of Science and Technology,  
25 University of Macau 999078, Macau SAR, China

26

27 \*Corresponding authors; For Correspondence. E-mail: tim.junhuili@gmail.com

28

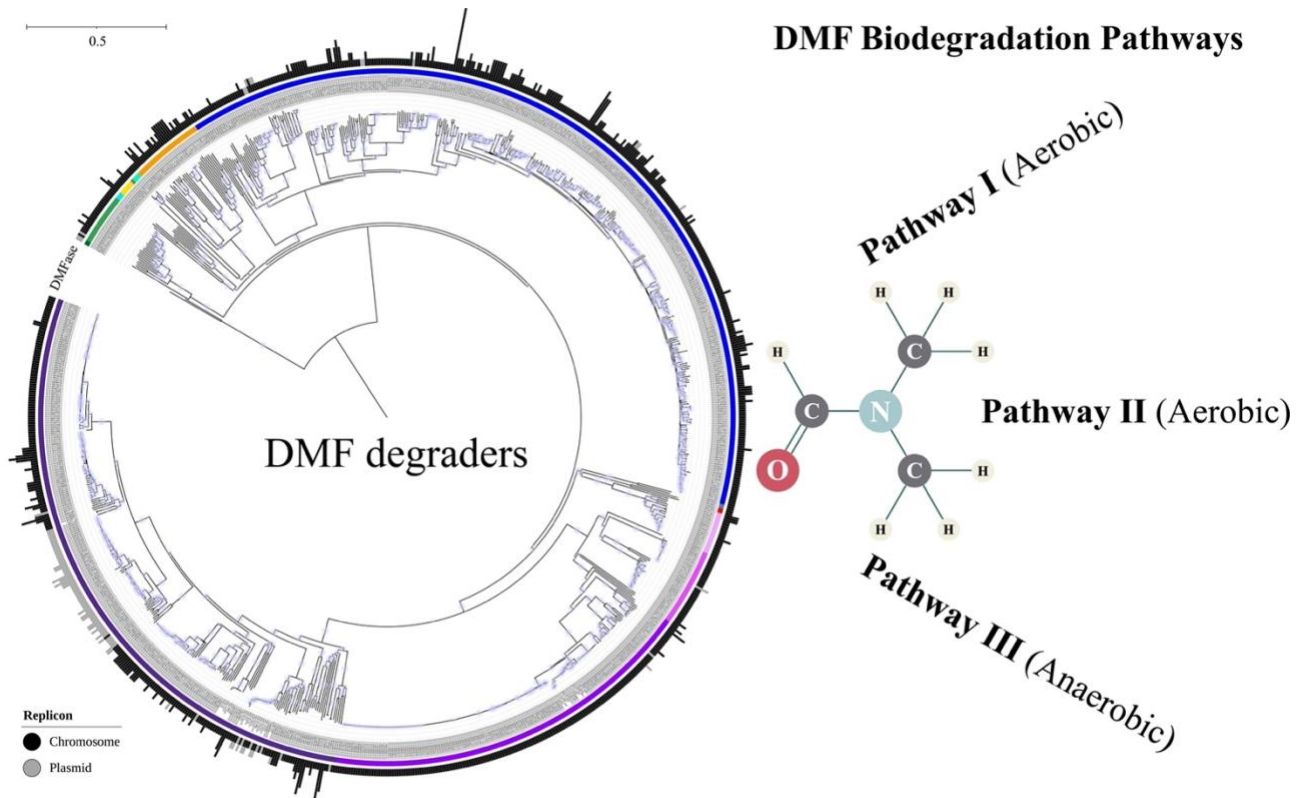

29

30

31

32 **Abstract**

33 Effective degradation of *N,N*-Dimethylformamide (DMF) is challenging as only few bacterial  
34 isolates are known to be capable of degrading DMF. Here, we analyzed 20,762 complete genomes  
35 and 28 constructed draft genomes for the genes associated with DMF degradation. We identified 952  
36 genomes that harbor genes involved in DMF degradation, expanding the known diversity of  
37 prokaryotes with these metabolic capabilities. Our findings suggest horizontal acquisition of  
38 DMF-degrading gene via plasmids are important in the order Rhizobiales and genus *Paracoccus*, but  
39 not most other lineages. Degradation pathway analysis reveals that most putative DMF degraders  
40 using aerobic Pathway I will accumulate the methylamine (MA) intermediate, while members of the  
41 *Paracoccus*, *Rhodococcus*, *Achromobacter*, and *Pseudomonas* genera could potentially mineralize  
42 DMF completely under the aerobic condition. The aerobic DMF degradation via Pathway II is more  
43 common than thought and is primarily present in  $\alpha$ -,  $\beta$ -Proteobacteria and Actinobacteria classes.  
44 Most putative DMF degraders could grow with supplied nitrate anaerobically (Pathway III), however,  
45 genes for the use of compound methyl-CoM to produce methane were not found in selected genomes.  
46 These analyses suggest that microbial consortia could be more advantageous in DMF degradation  
47 than pure culture, particularly for methane production under the anaerobic condition. The identified  
48 genomes form an important foundation for optimizing DMF degradation and have important  
49 applications for the bioremediation of DMF-containing wastewaters.

50

51 Keywords: DMF; Biodegradation pathways; Plasmid-mediated HGT; Denitrification;  
52 Methanogenesis

53

54

## 55 **Importance**

56 DMF is extensively used as a solvent in industries, and was classified in Group 2A (probable  
57 carcinogens). DMF is a refractory compound resistant to degradation, and until now, only few  
58 bacterial isolates have been reported to degrade DMF. To achieve effective microbial degradation of  
59 DMF from wastewater, it is necessary to identify genomic diversity with the potential to degrade  
60 DMF and characterize the genes involved in two aerobic degradation pathways and potential  
61 anaerobic degradation for methane production. A wide diversity of organisms have the potential to  
62 degrade DMF. Plasmid-mediated horizontal gene transfer could play critical roles in DMF  
63 degradation for Rhizobiales and *Paracoccus*. Most DMF degraders could grow anaerobically with  
64 nitrate as electron acceptor, while co-cultures are required to complete intermediate methanogenesis  
65 for methane production. This is the first genomics-based global investigation into DMF degradation  
66 pathways. The database generated by this study lay an important and currently missing foundation for  
67 the degradation of DMF.

68

69

## 70 1. Introduction

71 *N,N*-Dimethylformamide (DMF) is a synthetic solvent with low evaporation rate, complete  
72 miscibility with water and the majority of other solvents, and is extensively used in synthetic textile,  
73 leather, electronics, pharmaceutical and pesticides industries (1). DMF is listed as a high production  
74 volume chemical (2), with an estimated global annual consumption of 285,000 ton in 2001 (3). The  
75 global consumption of DMF is expected increase dramatically (4). Its use creates industrial  
76 wastewater with high levels of DMF, risking contamination of the environment. DMF ranks 7th on  
77 the Japanese Pollutant Release and Transfer Register in both the Sewage Treatment Plant and Wastes  
78 (5). DMF is a leading cause of liver disease in chronically exposed workers (6), and elevated risks of  
79 a cardiac injury and liver and kidney dysfunction of the general population living near synthetic  
80 leather factories (7). DMF was classified as probably carcinogenic to humans (Group 2A) by  
81 International Agency for Research on Cancer (2).

82 Various physicochemical methods have been investigated to remove DMF from wastewater,  
83 including photocatalytic oxidation (8, 9), plasma oxidation (10), catalytic wet oxidation (11, 12),  
84 physical adsorption (13, 14), membrane separation (15, 16), and chemical extraction (17). Microbial  
85 degradation is considered to be a superior alternative as it is economical, eco-friendly, and highly  
86 efficient (18-22). So far, limited bacterial isolates are capable of utilizing DMF as the sole carbon and  
87 nitrogen source, including members of *Paracoccus*, *Methylobacterium*, *Mesorhizobium*,  
88 *Ochrobactrum*, *Alcaligenes*, *Pseudomonas*, *Mycobacterium*, and *Bacillus* (Table 1). Besides  
89 *Paracoccus* and *Bacillus*, members of six additional genera (i.e., *Hyphomicrobium*, *Nitratireductor*,  
90 *Burkholderia*, *Rhodobacter*, *Catellibacterium*, and *Bradyrhizobium*) were recently reported as  
91 potential DMF degraders under anaerobic conditions (23-25). In our recent study, *Paracoccus* and  
92 *Hyphomicrobium* are likely major DMF degraders under aerobic conditions identified using  
93 amplicon-based marker gene analyses (26), and supported by the identification of genes encoding  
94 *N,N*-dimethylformamidase (DMFase) (27). In addition, members of six other genera, i.e.,  
95 *Achromobacter*, *Methyloversatilis*, *Nitratireductor*, *Pontibaca*, *Rhodopseudomonas*, and *Starkeya*,  
96 carry genes encoding the large and/or small subunits of DMFase (27). These results consolidate the  
97 wide distribution of DMF degraders beyond our current knowledge. It would be useful to determine  
98 if more taxa which are capable of degrading DMF.

99 Aerobic degradation of DMF is considerably more efficient than anaerobic degradation (24, 28).  
100 Therefore, most of the studies have been centered on the aerobic degradation of DMF. Nevertheless,  
101 a capability of DMF degraders to conduct denitrification would offer additional advantage for  
102 removal of DMF in environments with low oxygen availability (22). Anaerobic degradation of  
103 DMF is possible for denitrifiers, utilizing nitrate as an electron acceptor. It would be particularly  
104 beneficial under anaerobic condition if DMF degraders are methanogens, which could produce  
105 energy. These facultative DMF-degrading bacteria require nitrate as the electron acceptor and the  
106 presence of methanogens to utilize intermediates of DMF degradation (23, 29). However, it is unclear  
107 if denitrifying and/or methanogenic DMF degraders exist in nature.

108 Genes related to DMF degradation are either present on chromosomes or plasmids of bacteria.  
109 Multiple strains, e.g., *Paracoccus aminovorans* JCM 7685 (30), *Paracoccus aminophilus* JCM 7686  
110 (31), and *Methylobacterium* sp. DM1 (32), are reported to carry genes encoding DMFase on the  
111 plasmid. Likewise, recently we found that, of the 13 *Paracoccus* metagenomic assembled genomes  
112 (MAGs) which harbor the large subunit of DMFase, 11 MAGs have plasmids with a copy of this  
113 gene, while 4 only have this gene on their plasmid (27). The presence of plasmids carrying  
114 DMF-degrading genes suggests the possibility of horizontal gene acquisition, regardless of ancient  
115 or recent events. In most cases, DMF degrader isolates described in the literature are taxonomically  
116 identified using 16S rRNA gene, but complete genomes of most isolates are missing, hindering our  
117 ability to test if these bacteria carrying the genes encoding DMFase are the result of vertical descent  
118 or horizontal acquisition.

119 Here, we summarized all DMF-degrading bacterial isolates from published literature and  
120 described their abilities to grow anaerobically, to reduce nitrate, and to degrade hydrolysis  
121 intermediates of DMF. Moreover, we analyzed all 20,762 complete prokaryotic genomes deposited in  
122 GenBank and the 28 MAGs from enriched microbial consortia with DMF as the carrier solvent (26,  
123 27) to resolve the questions mentioned above: 1) identify the putative DMF degraders and the  
124 metabolic pathways from DMF degradation, 2) determine whether the gene inherits vertically or  
125 horizontally, and 3) determine whether the putative DMF degraders have the capability to utilize  
126 nitrate as an electron acceptor and to utilize intermediates of DMF degradation to produce methane.

127 Overall, the current study substantially expands our knowledge of the diversity of DMF degraders  
128 and their potential to function under aerobic and anaerobic conditions.

129

## 130 **2. Materials and methods**

### 131 *2.1. Bioinformatic analyses*

132 To identify putative DMF degraders, the nucleotide sequences of 20,762 complete prokaryotic  
133 genomes deposited in GenBank (accessed 11-22-2020) were downloaded and processed using  
134 Prodigal (33) to call open reading frames (ORFs). The resulting ORFs were searched against the  
135 metabolic pathways of DMF degradation (34) in the KOfam database (35) using hmmscan (E-value <  
136  $1e-15$  and covered fraction of hmm > 50%) in HMMER V3.2.1 (36). Subsequently, the predicted  
137 ORFs of selected genomes harboring at least one copy of the gene for the large and/or small subunit  
138 of DMFase were searched against the targeted KO families mapped to pathways of nitrogen  
139 (map00910) and methane (map00680) metabolism from the KOfam database (35). The 28 MAGs  
140 carrying genes encoding DMFase from enriched microbial consortia (27) were analyzed using the  
141 same procedure. Caution should be taken when interpreting the results. A strict cut-off (i.e., e-value <  
142  $1e-15$  and a coverage > 50% of the gene) was applied to identify the gene in the genomes/MAGs,  
143 which may result in the drop of genes. In addition, the presence of a gene is not evidence for the  
144 occurrence of the process.

145 The number of replicons (i.e., chromosome and plasmid) contained in each complete genome  
146 were obtained from prokaryotic genome reports  
147 ([ftp://ftp.ncbi.nlm.nih.gov/genomes/GENOME\\_REPORTS/prokaryotes.txt](ftp://ftp.ncbi.nlm.nih.gov/genomes/GENOME_REPORTS/prokaryotes.txt)). To determine the  
148 location of the genes encoding DMFase, we mapped the GenBank accession number to chromosome  
149 or plasmid. The location of genes encoding DMFase of the MAGs were based on the predicted  
150 plasmid information using Platon V1.2.0 (37) in a separated study (27), whereas the number of  
151 replicons contained in the MAGs is unknown.

152

### 153 *2.2. Phylogenetic visualization*

154 The phylogenetic trees of 952 putative DMF degraders were constructed using Geneious  
155 (<https://www.geneious.com>) with 40 single-copy marker genes (38) which were extracted from the

156 ORFs with fetchMGs v1.2 (39), aligned with Clustalo (40), and trimmed with trimAl v1.2 (-gt 0.5)  
157 (41). Likewise, a neighbor-joining phylogenetic tree of 1,243 amino acid sequences of K03418 gene  
158 encoding the large submit of DMFase in 952 putative DMF degraders was constructed using  
159 Geneious with the same extraction, alignment, and trimming methods using amino acid sequences.  
160 Interactive Tree Of Life (iTOL) (42) was applied to visualize the phylogenetic trees.

161

### 162 2.3. Data availability

163 The 28 MAGs containing genes encoding DMFase are available at  
164 <https://bitbucket.org/junhuilinau/hmm/src/master/>.

165

## 166 3. Results

### 167 3.1. Available DMF degrading isolates from the literature

168 At the time of writing, there are around 30 reported bacterial isolates capable of degrading and  
169 utilizing DMF as the sole carbon and nitrogen source (Table 1). All isolated DMF degraders are  
170 aerobic, and from the phylum Proteobacteria, particularly Alphaproteobacteria and  
171 Gamaproteobacteria. Additionally, one Actinobacteria isolate (43) and two Firmicutes isolates (44,  
172 45) have been characterized. Most of these DMF degraders are capable of reducing nitrate but  
173 hydrolyzing urea. Of these bacterial isolates, some (e.g., *Paracoccus* sp. DMF-3, *Alcaligenes* sp.  
174 KUFA-1, and *Pseudomonas* sp. DMF 5/8) can grow on high concentration (~ 50 g/L) DMF solutions.

175 Two pathways have been reported for aerobic DMF degradation (34): I) DMFase hydrolyzing  
176 DMF to formate and dimethylamine (DMA), followed by converting DMA to methylamine (MA) by  
177 dimethylamine dehydrogenase (Fig. 1). This is the most common pathway. II) DMF is degraded via  
178 sequential oxidative demethylations, giving rise to *N*-methylformamide (NMF), formaldehyde  
179 (HCHO), and formamide (FA), which can be further converted to ammonia and formate by  
180 formamidase (Fig. 1). Under aerobic conditions, DMF is ultimately degraded to NH<sub>4</sub><sup>+</sup> and CO<sub>2</sub> in  
181 both pathways. Most tested isolates from literature are capable of degrading NMF (20 isolates), DMA  
182 (24) and MA (24), whereas 23 tested positive and 2 negative for FA degradation activity, and 19  
183 tested positive and 3 negative for formate degradation activity (Table 1). Results for *Paracoccus*



184 *aminophilus* DM-15 (= JCM 7686) were contradictory (46, 47). Our genomic analysis described  
185 below supports the idea that this isolate is capable of oxidizing formate (Fig. 1).

186 Recently, anaerobic degradation of DMF by microbial consortia is attracting increasing interest  
187 because of the simultaneous energy production (23, 29, 48-50). The anaerobic degradation of DMF  
188 depends on facultative DMF-degrading bacteria and the presence of intermediate-utilizing  
189 methanogens for methane production, and requires nitrate as electron acceptor (23, 29). Among the  
190 intermediates of aerobic Pathway I, DMA and MA are common substrates for methylotrophic  
191 methanogens (51), while formate can be fermented to methane by hydrogenotrophic methanogens  
192 (52). Pathway III was recently proposed for anaerobic conditions (48). Here DMF is hydrolyzed to  
193 formate and DMA by facultative DMF-degrading bacteria, while formate and DMA were  
194 subsequently converted to methane by hydrogenotrophic and methylotrophic methanogens.

195

### 196 3.2. Putative *N,N*-dimethylformamidase in prokaryotes

197 Among the 20,762 complete prokaryotic genomes, 924 (4.5%) harbor at least one copy of the  
198 gene encoding the large and/or small submits of DMFase (Fig. 1a). These genomes are  
199 phylogenetically distributed across 11 phyla, including Acidobacteria, Bacteroidetes, Chloroflexi,  
200 Cyanobacteria, Firmicutes, Nitrospira, Planctomycetes, and Verrucomicrobia, as well as archaeal  
201 Euryarchaeota. This is the first evidence that archaea have the potential for DMF degradation. The  
202 majority of genomes are from the Proteobacteria (472) and Actinobacteria (377) phyla. Additionally,  
203 28 MAGs, discovered in metagenomes from 1-year enriched microbial consortia in the presence of  
204 DMF as the carrier solvent (26, 27), contained genes encoding DMFase. A single copy of the gene  
205 encoding the small submit of DMFase is identified in 41 genomes/MAGs from Alphaproteobacteria  
206 (31), the *Mycolicibacterium* genus in Actinobacteria (10), and Betaproteobacteria (1). These results  
207 suggest the DMF degraders are far more widely distributed than previously known, and include  
208 archaea.

209

**Table 1** Summary of properties of bacterial DMF degraders from the literature

| (Sub)Phylum      | Genus                   | Strain                                                           | Aerobic                      | Anaerobic | Nitrate | Max    | NMF | DMA | MA | FA | HCHO | Formate | Reference                |         |
|------------------|-------------------------|------------------------------------------------------------------|------------------------------|-----------|---------|--------|-----|-----|----|----|------|---------|--------------------------|---------|
| α-Proteobacteria | <i>Paracoccus</i>       | <i>P. aminophilus</i> DM-15<br>(= JCM 7686)<br>(GCA_000444995.1) | +                            | +         | +       | 30     | +   | +   | +  | +  | +    | -/+     | (31, 43, 46, 47, 53, 54) |         |
|                  |                         | <i>P. aminovorans</i> DM-82<br>(= JCM 7685)<br>(GCA_900005615.1) | +                            | NA        | +       | 30     | +   | +   | +  | +  | NA   | -       | (43, 46)                 |         |
|                  |                         | <i>P. denitrificans</i> SD1                                      | +                            | +         | +       | > 28.3 | NA  | NA  | NA | NA | NA   | NA      | NA                       | (55-57) |
|                  |                         | <i>Paracoccus</i> sp. MKU1                                       | +                            | NA        | +       | > 9.4  | NA  | NA  | NA | NA | NA   | NA      | NA                       | (58)    |
|                  |                         | <i>Paracoccus</i> sp. MKU2                                       | +                            | NA        | +       | > 9.4  | NA  | NA  | NA | NA | NA   | NA      | NA                       | (58)    |
|                  |                         | <i>Paracoccus</i> sp. DMF                                        | +                            | NA        | +       | 15     | NA  | +   | +  | +  | NA   | +       | +                        | (20)    |
|                  |                         | <i>Paracoccus</i> sp. DMF-3                                      | +                            | NA        | NA      | 50     | +   | +   | +  | +  | NA   | NA      | NA                       | (19)    |
|                  | <i>Methylobacterium</i> | <i>Methylobacterium</i> sp. TH-15                                | +                            | NA        | NA      | 20     | +   | +   | +  | +  | NA   | -       | +                        | (43)    |
|                  |                         | <i>Methylobacterium</i> sp. DM1<br>(GCA_003111705.1)             | +                            | NA        | G       | > 2    | NA  | +   | +  | +  | +    | +       | +                        | (32)    |
|                  |                         | <i>Mesorhizobium</i>                                             | <i>M. tamadayense</i> MM3441 | +         | +       | +      | 40  | +   | +  | +  | +    | NA      | +                        | (22)    |
|                  | <i>Ochrobactrum</i>     | <i>Ochrobactrum</i> sp. DGVK1                                    | +                            | +         | NA      | > 18.9 | NA  | +   | +  | +  | NA   | +       | (21, 59)                 |         |
| β-Proteobacteria | <i>Alcaligenes</i>      | <i>Alcaligenes</i> sp. KUFA-1                                    | +                            | NA        | +       | 50     | NA  | NA  | NA | -  | NA   | NA      | (34, 60)                 |         |
| γ-Proteobacteria | <i>Pseudomonas</i>      | <i>Pseudomonas</i> sp. DMF 3/3                                   | +                            | NA        | +       | > 10   | +   | +   | +  | +  | NA   | +       | (34)                     |         |
|                  |                         | <i>Pseudomonas</i> sp. DMF 3/4                                   | +                            | NA        | +       | > 10   | +   | +   | +  | +  | NA   | +       | (34)                     |         |
|                  |                         | <i>Pseudomonas</i> sp. DMF 3/5                                   | +                            | NA        | +       | > 10   | +   | +   | +  | +  | NA   | +       | (34)                     |         |
|                  |                         | <i>Pseudomonas</i> sp. DMF 3/6                                   | +                            | NA        | +       | > 10   | +   | +   | +  | +  | NA   | +       | (34)                     |         |
|                  |                         | <i>Pseudomonas</i> sp. DMF 3/11                                  | +                            | NA        | +       | > 10   | +   | +   | +  | +  | NA   | +       | (34)                     |         |
|                  |                         | <i>Pseudomonas</i> sp. DMF 3/12                                  | +                            | NA        | +       | > 10   | +   | +   | +  | +  | NA   | +       | (34)                     |         |
|                  |                         | <i>Pseudomonas</i> sp. DMF/HW1-5                                 | +                            | NA        | +       | > 10   | +   | +   | +  | +  | NA   | +       | (34)                     |         |
|                  |                         | <i>Pseudomonas</i> sp. DMF 4/4                                   | +                            | NA        | +       | > 10   | +   | +   | +  | +  | NA   | +       | (34)                     |         |

|                |                      |                                 |   |    |    |       |    |    |    |    |    |    |      |
|----------------|----------------------|---------------------------------|---|----|----|-------|----|----|----|----|----|----|------|
|                |                      | <i>Pseudomonas</i> sp. DMF 5/3  | + | NA | +  | > 10  | +  | +  | +  | +  | NA | +  | (34) |
|                |                      | <i>Pseudomonas</i> sp. DMF 5/5  | + | NA | +  | > 10  | +  | +  | +  | +  | NA | +  | (34) |
|                |                      | <i>Pseudomonas</i> sp. DMF 5/7  | + | NA | +  | > 10  | +  | +  | +  | +  | NA | +  | (34) |
|                |                      | <i>Pseudomonas</i> sp. DMF 5/8  | + | NA | +  | 56.7  | +  | +  | +  | +  | NA | +  | (34) |
|                |                      | <i>Pseudomonas</i> sp. DMF 5/9  | + | NA | +  | > 10  | +  | +  | +  | +  | NA | +  | (34) |
|                |                      | <i>Pseudomonas</i> sp. DMF 5/10 | + | NA | +  | > 10  | +  | +  | +  | +  | NA | +  | (34) |
|                |                      | <i>Pseudomonas</i> sp. MBYD-1   | + | NA | NA | > 0.5 | NA | +  | +  | +  | NA | +  | (61) |
| Actinobacteria | <i>Mycobacterium</i> | <i>Mycobacterium</i> sp. TH-35  | + | NA | NA | 30    | +  | +  | +  | -  | NA | -  | (43) |
| Firmicutes     | <i>Bacillus</i>      | <i>B. cereus</i> D-1            | + | +  | +  | NA    | NA | NA | NA | NA | NA | NA | (45) |
|                |                      | <i>B. subtilis</i>              | + | NA | -  | NA    | NA | NA | NA | NA | NA | NA | (44) |

Max, the maximum concentration of DMF that permits bacterial growth of the isolate (g/L). NMF, *N*-methylformamide; DMA, dimethylamine; MA, methylamine; FA, formamide; HCHO, formaldehyde.

Growth activity: +, positive; -, negative; NA, not available. G, presence of the putative gene. -/+, conflicting results between studies.

206 The median copy number of the large subunit of DMFase (K03418) is 1, with *Catenulispora*  
207 *acidiphila* DSM 44928 (GCA\_000024025.1) within the Actinobacteria phylum harboring the  
208 maximum copies of K03418 gene (9). Totally, 216 genomes/MAGs (22.7%) carry multiple copies of  
209 K03418 gene, whereas the gene sequences within the same genome could be more similar to that of  
210 other genomes. For example, 4 K03418 genes on the chromosome of *Mesorhizobium terrae*  
211 (GCA\_008727715.1) are distributed in three clades (I.2, III.2, and IV.2), and nine K03418 genes on  
212 the chromosome of *Catenulispora acidiphila* DSM 44928 are distributed in clades I.2 and II.7 (Fig.  
213 2).

214 Next, we assessed the potential for degradation of intermediates in the DMF degradation pathways  
215 under the aerobic conditions (Fig. 1). In the case of Pathway I, 67.1% (639/952) of genomes/MAGs  
216 harbor K00317 encoding dimethylamine dehydrogenase [EC:1.5.8.2]. These genomes/MAGs belong  
217 to Firmicutes, Actinobacteria, and  $\alpha$ -,  $\beta$ -,  $\gamma$ -Proteobacteria (Fig. 1a). Only 5.8% (55/952)  
218 genomes/MAGs carry at least one copy of genes (K08685, K15228, or K15229) encoding MA  
219 dehydrogenase [EC:1.4.9.1]. Thirteen additional genomes/MAGs carry genes encoding MA  
220 dehydrogenase but none for DMA dehydrogenase. Of the 55 putative DMA and MA degraders, 3  
221 genomes don't carry K00148 encoding HCHO dehydrogenase [EC:1.2.1.46] which converts HCHO  
222 to F, although K00148 is present in 98% (933/952) of the DMF degrading genomes/MAGs (median  
223 copy 8). Moreover, all 68 putative MA degraders carry K00148.

224 In Pathway II, K01455 encoding formamidase [EC:3.5.1.49] converts FA to formate and is present  
225 in 304 genomes/MAGs. The gene involved in formate oxidation is ubiquitous, i.e., at least one of the  
226 genes (K00122, K00123, K00126, and K22515) encoding formate dehydrogenase is present in all  
227 952 genomes/MAGs. MA is often the end-product of the DMF degradation (Pathway I) in most  
228 putative DMF degraders, as the genes encoding MA dehydrogenase [EC:1.4.9.1] are absent. For 52  
229 genomes/MAGs, genes for complete mineralization of DMF to CO<sub>2</sub> are present, including 25  
230 genomes/MAGs that carry the formamidase gene (including 15 *Rhodococcus* (Actinobacteria) and 7  
231 *Paracoccus* MAGs ( $\alpha$ -Proteobacteria)).

232

A

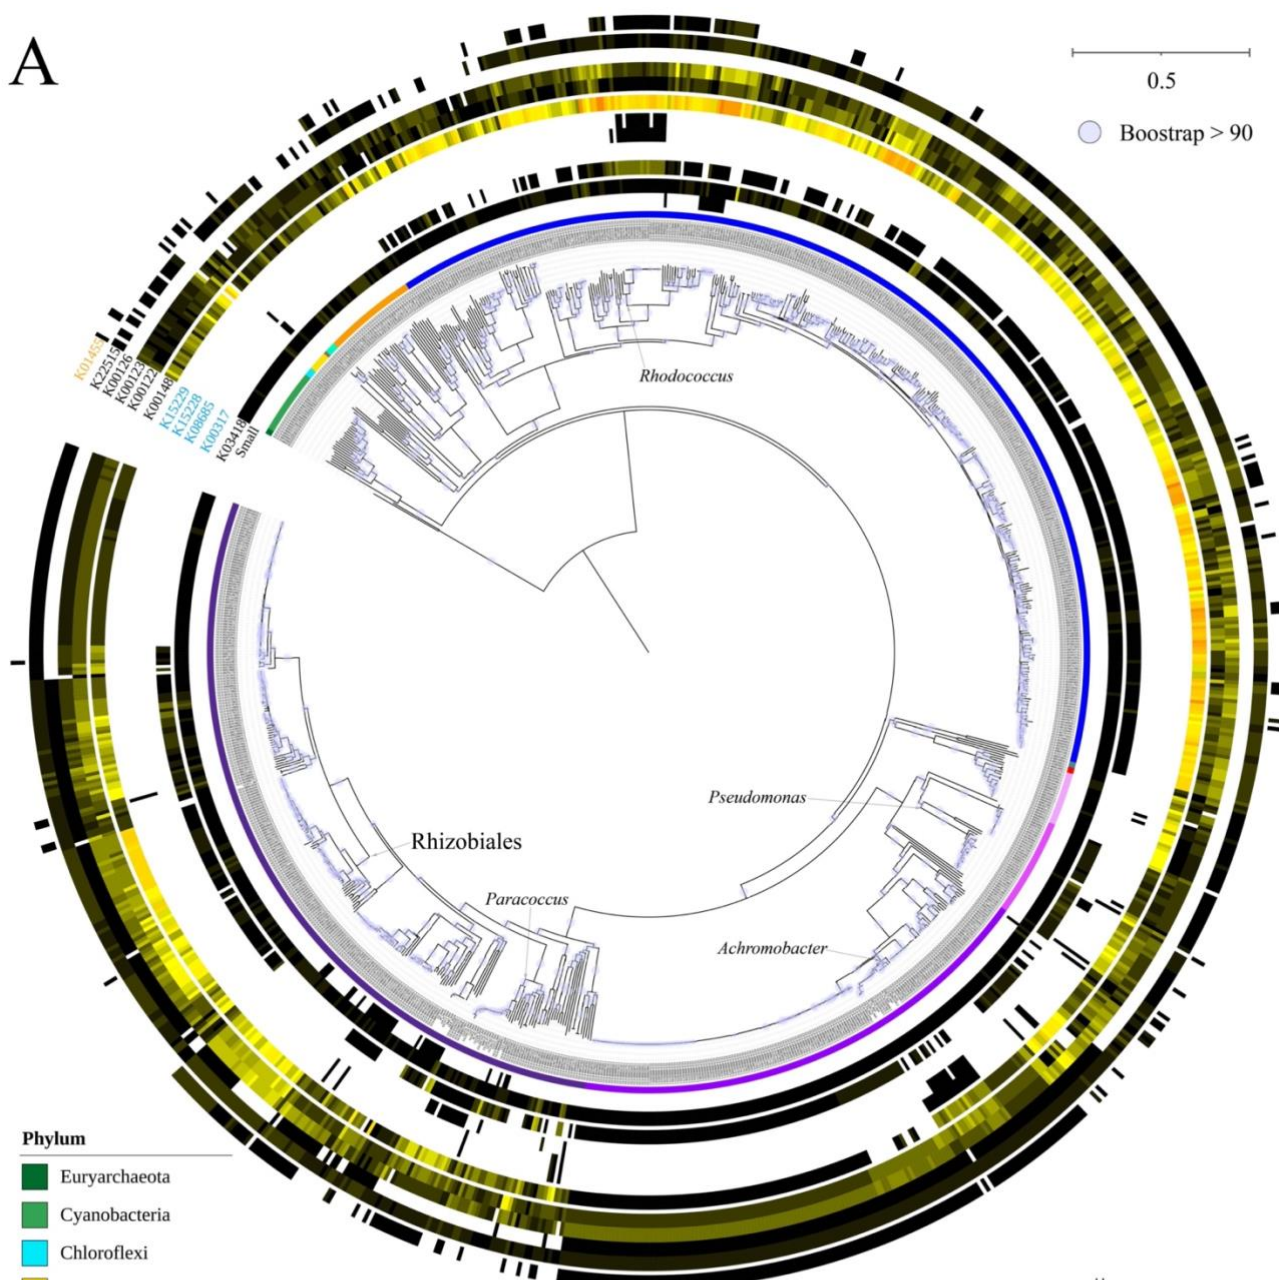

Phylum

- Euryarchaeota
- Cyanobacteria
- Chloroflexi
- Firmicutes
- Verrucomicrobia
- Bacteroidetes
- Planctomycetes
- Actinobacteria
- Nitrospira
- Acidobacteria
- Deltaproteobacteria
- Gammaproteobacteria
- Betaproteobacteria
- Alphaproteobacteria

Gene copy

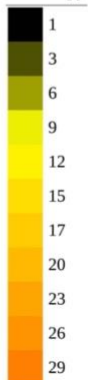

B

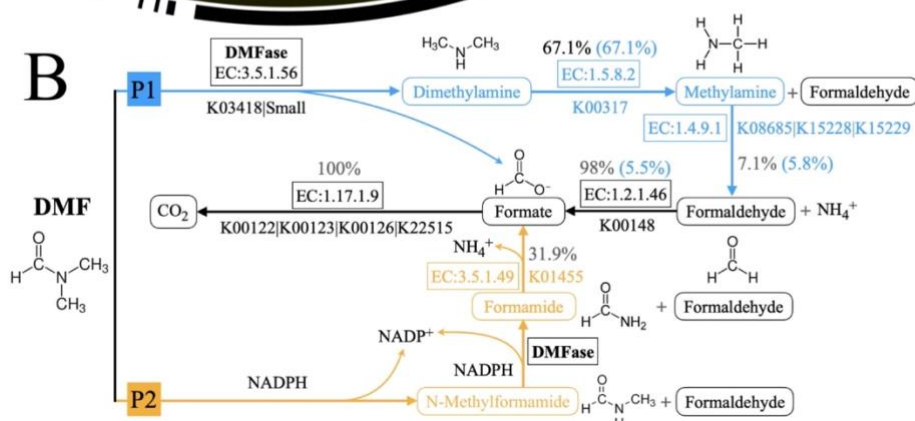

233

234

235

236

**Fig. 1** Phylogenetic distribution of putative DMF degraders. A) genes involved in DMF mineralization. The consensus phylogenetic tree was based on 40 single copy marker genes (see Methods for details); B) DMF mineralization pathways under aerobic conditions (34). Enzyme

237 involved in the first step of Pathway II is unknown. Squares indicate enzyme; rounded rectangles  
238 indicate produced intermediates. Percentage in black indicates genomes involved in the specific step  
239 of the degradation process; percentage in light blue in the brackets indicates genomes involved in  
240 each step from DMF to the specific intermediate of the degradation process. Line in light blue  
241 indicates pathway I; line in orange indicate pathway II; line in black indicates shared metabolic  
242 reactions.

243

### 244 3.3. The role of horizontal gene acquisition via plasmids in DMF degradation

245 It is estimated that 1.6-32.6% of the genes of each prokaryotic genome has been acquired via  
246 horizontal gene transfer (HGT) (62). Previous studies have provided evidence of plasmid-borne  
247 genes encoding DMFase (27, 31, 32). However, it is unclear whether horizontal acquisition of this  
248 gene is frequent because of the low number of sequenced genomes of DMF degraders. Out of the  
249 952 genomes/MAGs, 34.2% (326) carry at least one plasmid, whereas 90% (857) carry one or more  
250 copies of K03418 only on the chromosome. A total of 95 genomes/MAGs, accounting for 29.1% of  
251 326 genomes with plasmid, harbor the K03418 gene on the plasmid, while 18 genomes carry the gene  
252 on both the chromosome and the plasmid and 77 genomes harbor K03418 only on the plasmid.  
253 Notably, all 59 putative DMF degraders in the Rhizobiales order of  $\alpha$ -Proteobacteria only harbor  
254 K03418 on their plasmids, with the exception of *Ensifer mexicanus* ITTG R7 (GCA\_013488225.1)  
255 and *Ciceribacter thiooxidans* F43B (GCA\_014126615.1) which harbor K03418 on both the plasmid  
256 and chromosome (Fig. 3). Multiple copies (median 4) of plasmids in Rhizobiales genomes could  
257 enhance the opportunity to acquire K03418 gene. Our analyses suggest that plasmids play an  
258 important role in acquisition of genes encoding DMFase in the order Rhizobiales.

259 The majority of K03418 sequences (60) in Rhizobiales genomes clustered together in clade I.3  
260 with other  $\alpha$ -Proteobacteria genomes, while the other 18 K03418 sequences in Rhizobiales genomes  
261 are distributed in three other clades, including, II.3, consisting of 3 Rhizobiales sequences and 12  
262 Cyanobacteria sequences; III.2 (4), where 4 K03418 sequences in Rhizobiales are similar to  
263 sequences of other  $\alpha$ -Proteobacteria, and IV.2, consisting of 11 K03418 sequences in Rhizobiales,  
264 which are similar to K03418 sequences of Actinobacteria and other  $\alpha$ -,  $\beta$ -,  $\gamma$ -Proteobacteria (Fig. 2).  
265 Likewise, multiple *Paracoccus* genomes carry K03418 only on the plasmid. These results suggest

266 that, irrespective of ancient or recent HGT event, horizontal gene acquisition via plasmids plays a  
 267 critical role in DMF degradation, particularly for Rhizobiales and *Paracoccus*.  
 268

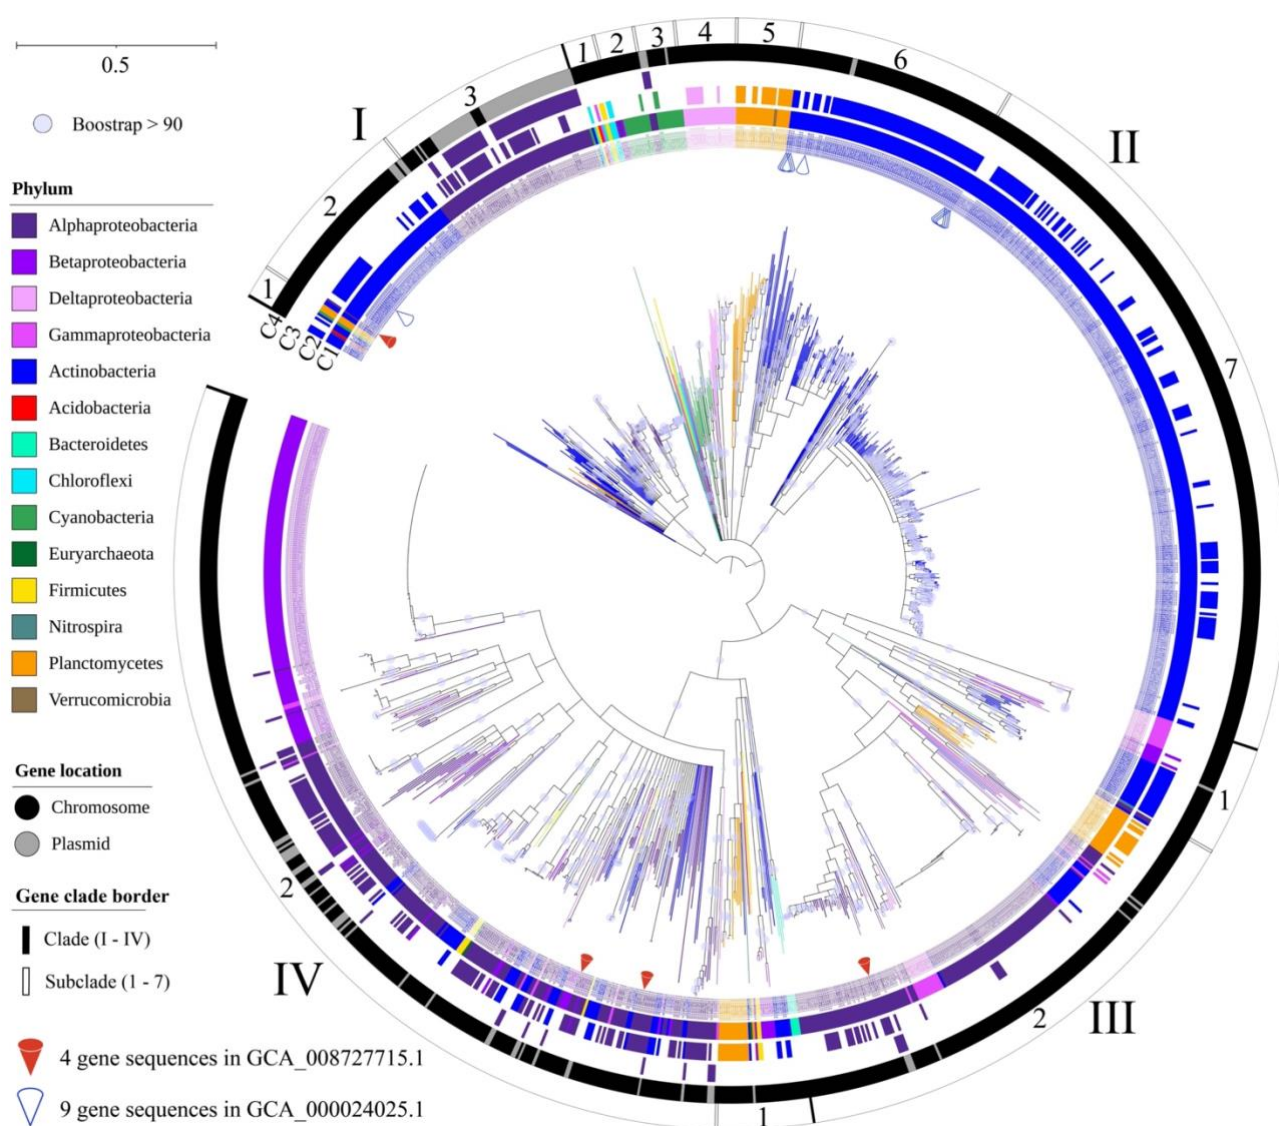

269  
 270 **Fig. 2** Neighbor-joining phylogenetic tree of 1,243 amino acid sequences of K03418 in 952 putative  
 271 DMF degraders. The inner circle C1 indicates individual K03418 sequences; the middle circle C2  
 272 indicates K03418 sequences that are present in a genome/MAG in multiple copies; the middle circle  
 273 C3 indicates K03418 sequences in the order of Rhizobiales; the outer circle C4 indicates gene  
 274 location (chromosome or plasmid). Colors of inner circle (C1), middle circles (C2, C3), and the labels  
 275 indicate phyla.

276  
 277 In addition, both putative archaeal DMF degraders, *Haloferax gibbonsii* LR2 and  
 278 *Halalkalicoccus jeotgali* B3, carry a single copy of K03418 on their plasmids. Nineteen out of 23

279 Cyanobacteria genomes carry plasmids (median 5 copies), including *Nostoc* sp. C057  
280 (GCA\_013393925.1) which carries the most copies (15) of plasmids among all DMF degraders,  
281 whereas only 1 Cyanobacteria genome harbors K03418 on the plasmid. It appears that  
282 plasmid-mediated HGT of K03418 is rare in Cyanobacteria, indicative of vertical descent. This is  
283 further supported by the evolutionary analyses of K03418 gene, i.e., the K03418 sequences of  
284 Cyanobacteria are clustered together in II.2 and II.3 (Fig. 2), in contrast to Proteobacteria,  
285 Actinobacteria and Planctomycetes where they are not clustered together.  
286

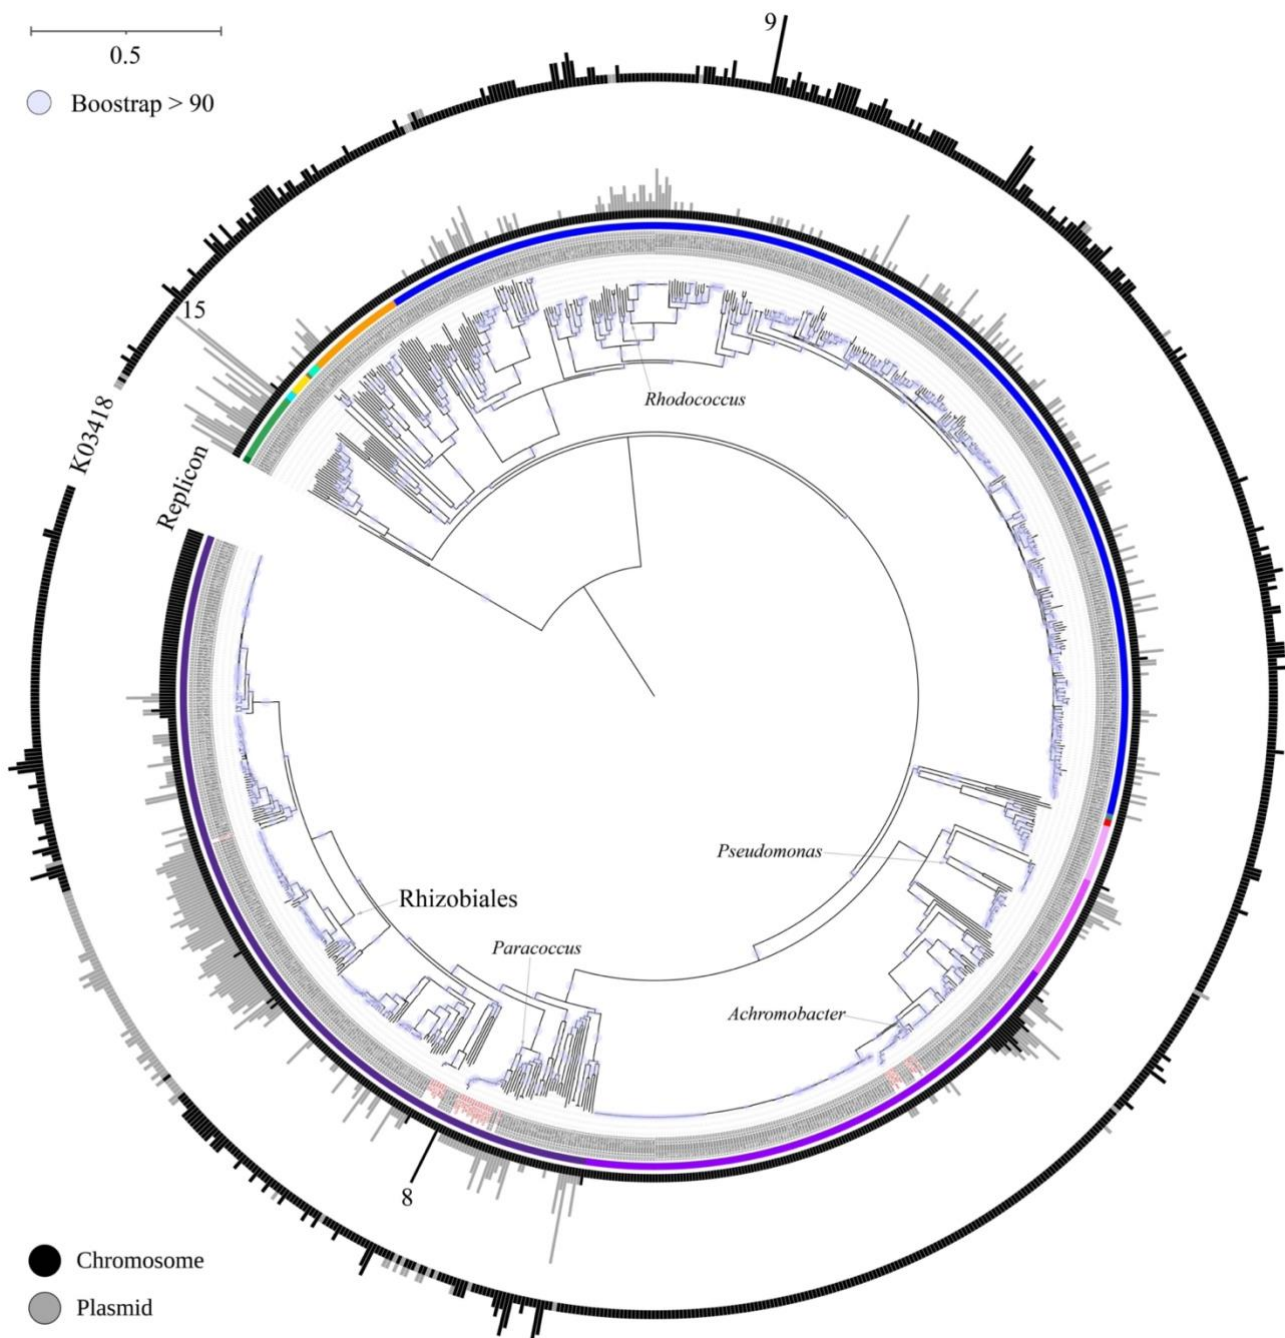

287



288 **Fig. 3** Presence of DMFase (K03418) on plasmids. The inner bar indicates the copy number of  
289 replicons (chromosome and plasmid), the outer bar indicates the copy number of K03418. The MAGs  
290 in red indicate the presence or absence of plasmids estimated in a separate study (27) rather than the  
291 specific copies of chromosome and plasmid.

292

### 293 3.4. Anaerobic degradation of DMF with nitrate but no methane production

294 The anaerobic degradation of DMF, i.e., Pathway III, has been tested in lab-scale anaerobic  
295 bioreactors (23, 29). However, culturing the DMF-degrading bacteria under anaerobic conditions is  
296 difficult. Although all isolates metabolize DMF aerobically, several are known as facultative  
297 anaerobes (Table 1), e.g., *Paracoccus aminophilus* JCM 7686, *Paracoccus denitrificans* SD1,  
298 *Mesorhizobium tamadayense* MM3441, *Ochrobactrum* sp. DGVK1, and *Bacillus cereus* D-1.  
299 Anaerobic degradation of DMF is possible for denitrifiers, which use nitrate as an electron acceptor.

300 We analyzed the presence of nitrate reduction genes involved in three pathways, i.e., assimilatory  
301 nitrate reduction (to ammonium), dissimilatory nitrate reduction (to ammonium), and denitrification  
302 to N<sub>2</sub>. Of 952 putative DMF degraders, 96.4% (918) possess genes for all steps of at least one of the  
303 three nitrate reduction pathways (Fig. 4). About 95.2% (906) harbor genes for assimilatory nitrate  
304 reduction to ammonium; 40.2% (383) harbor the genes involved in dissimilatory nitrate reduction to  
305 ammonium; and 10.8% (103) harbor all genes involved in each step of denitrification. These results  
306 suggest that most putative DMF degraders are likely to grow under the anaerobic condition while  
307 utilizing nitrate as electron acceptor. The addition of nitrate to anaerobic bioreactors therefore could  
308 be sufficient for DMF degradation under anaerobic conditions (18).

309 A total of 632 (66.4%) putative DMF degraders are potential denitrifiers that also possess  
310 K00317 encoding DMA dehydrogenase, converting DMA to MA and HCHO, and among which 55  
311 genomes/MAGs harbor genes involved in MA oxidation. A total of 616 genomes/MAGs possess  
312 K00148 which converts HCHO to formate (Fig. 4a). Additionally, 299 putative denitrifiers, carrying  
313 K01455, have the potential to convert FA (Pathway II intermediate) to F. Moreover, all putative  
314 denitrifiers can utilize formate as substrate. It appears the putative denitrifiers among the DMF  
315 degraders are capable of utilizing the metabolic intermediates, particularly formate and HCHO, to  
316 grow under the anaerobic condition.

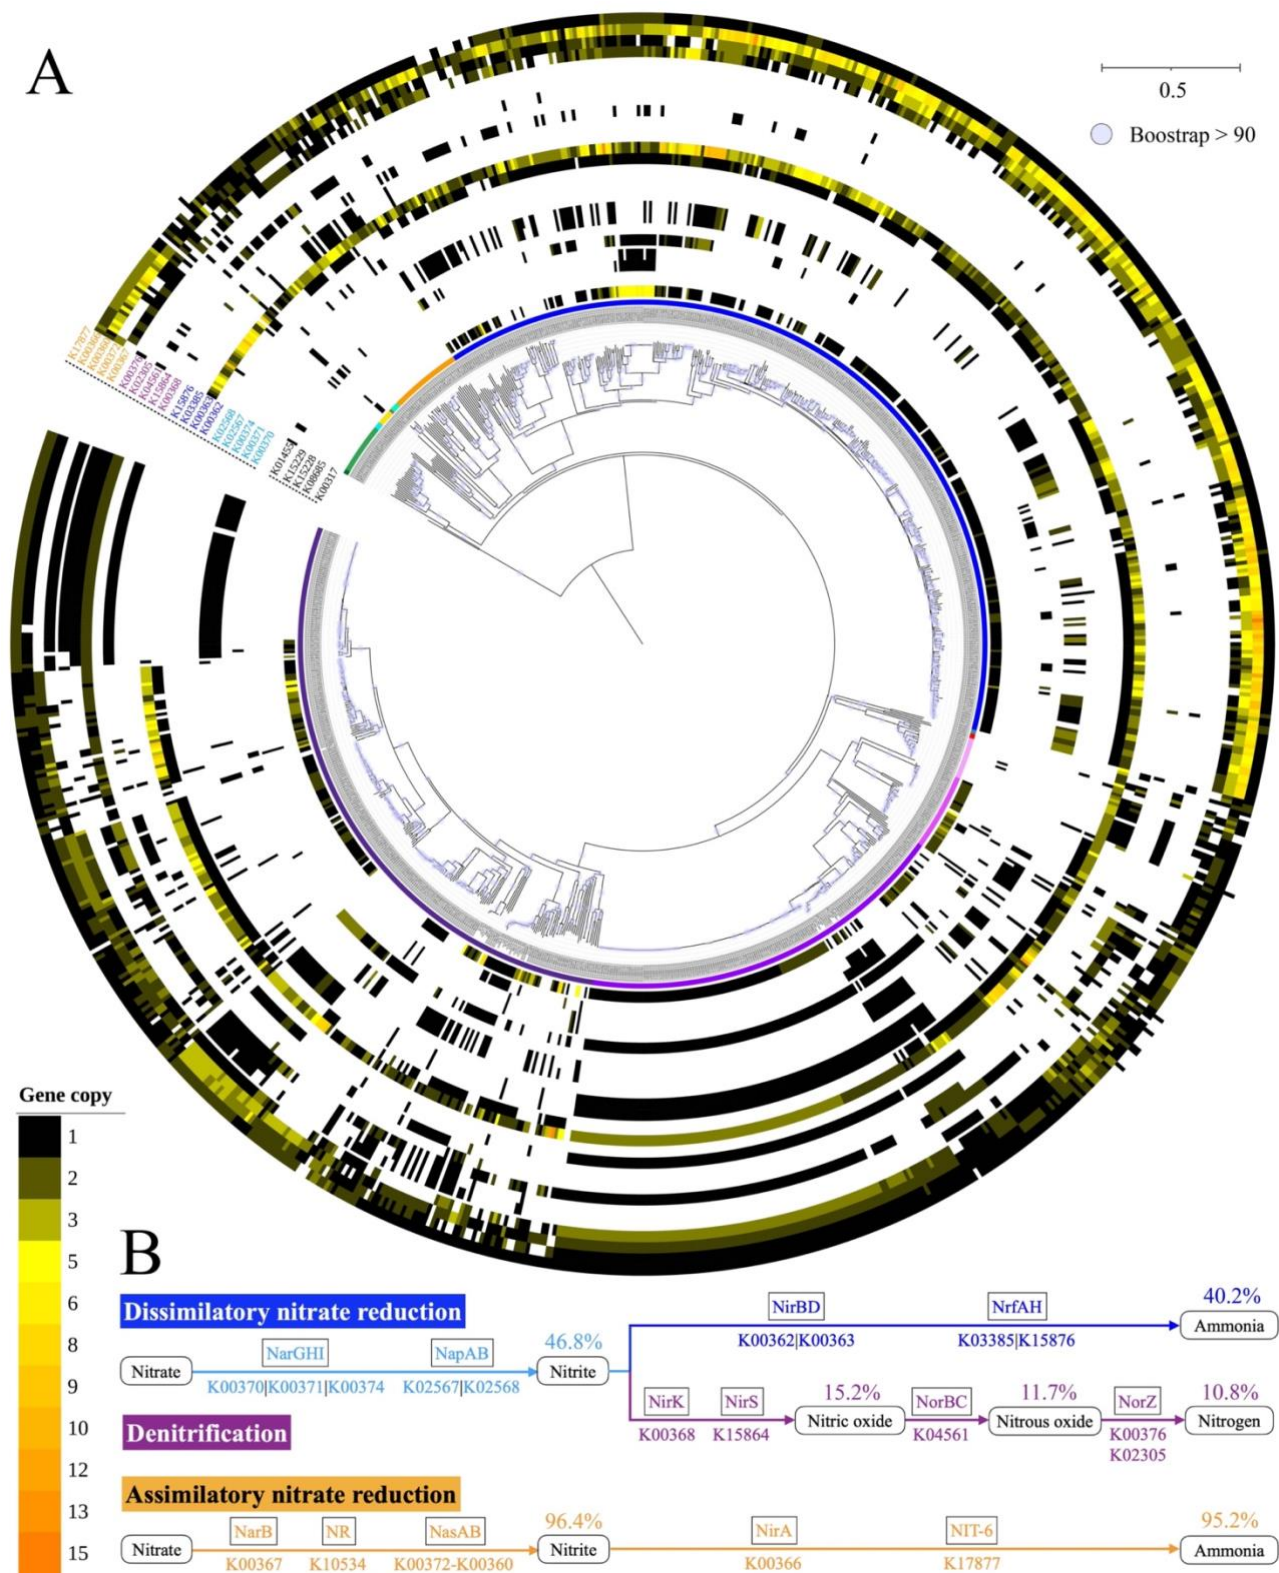

317

318 **Fig. 4** Nitrate reduction of putative DMF degraders. A) Enzymes and genes involved in nitrate  
 319 reduction; B) three nitrate reduction pathways (KEGG map00910). Squares indicate abbreviated  
 320 enzyme names; rounded rectangles indicate produced intermediates. Percentage indicates genomes  
 321 involved in each step from DMF to the specific intermediate of the degradation process. Line in light  
 322 blue indicates the first step of dissimilatory nitrate reduction and denitrification; line in blue indicates

323 the second step of dissimilatory nitrate reduction; line in purple indicates the other steps of  
324 denitrification; line in orange indicates the assimilatory nitrate reduction.

325

326 One advantage of anaerobic DMF degradation is energy production. Simultaneous methane  
327 production was achieved while degrading DMF using microbial consortium, albeit maintaining  
328 continuous culture is difficult (23, 29). We next analyzed the potential of putative DMF degraders to  
329 produce methane (Fig. 5). Although 910 genomes/MAGs possess the genes involved in the  
330 conversion of DMA to methyl-CoM, the genes for methyl-CoM reductase [EC:2.8.4.1] needed to  
331 produce methane was not observed. In addition, none of the genomes/MAGs carry genes for  
332 converting MA to methyl-CoM. These results suggest that microbial consortia are required that  
333 include methanogens to complete the methanogenesis of DMA and MA for methane production.  
334 Moreover, when formate is used as the electron donor, it is oxidized by formate dehydrogenase  
335 [EC:1.17.98.3, EC:1.8.98.6] to CO<sub>2</sub> and reduced coenzyme F420, which is a required intermediate  
336 for methane production (63). Although 929 genomes/MAGs have the potential to oxidize formate to  
337 reduced coenzyme F420, none of the genomes harbors the genes encoding methyl-CoM reductase  
338 [EC:2.8.4.1] involved in the last step from methyl-CoM to methane.

339 Together these findings suggest over 50% of the putative DMF degraders could grow  
340 anaerobically while utilizing nitrate as electron acceptor and degrade the hydrolyzed intermediates,  
341 whereas other methanogens are required to complete the methanogenesis of DMA to produce  
342 methane.

A

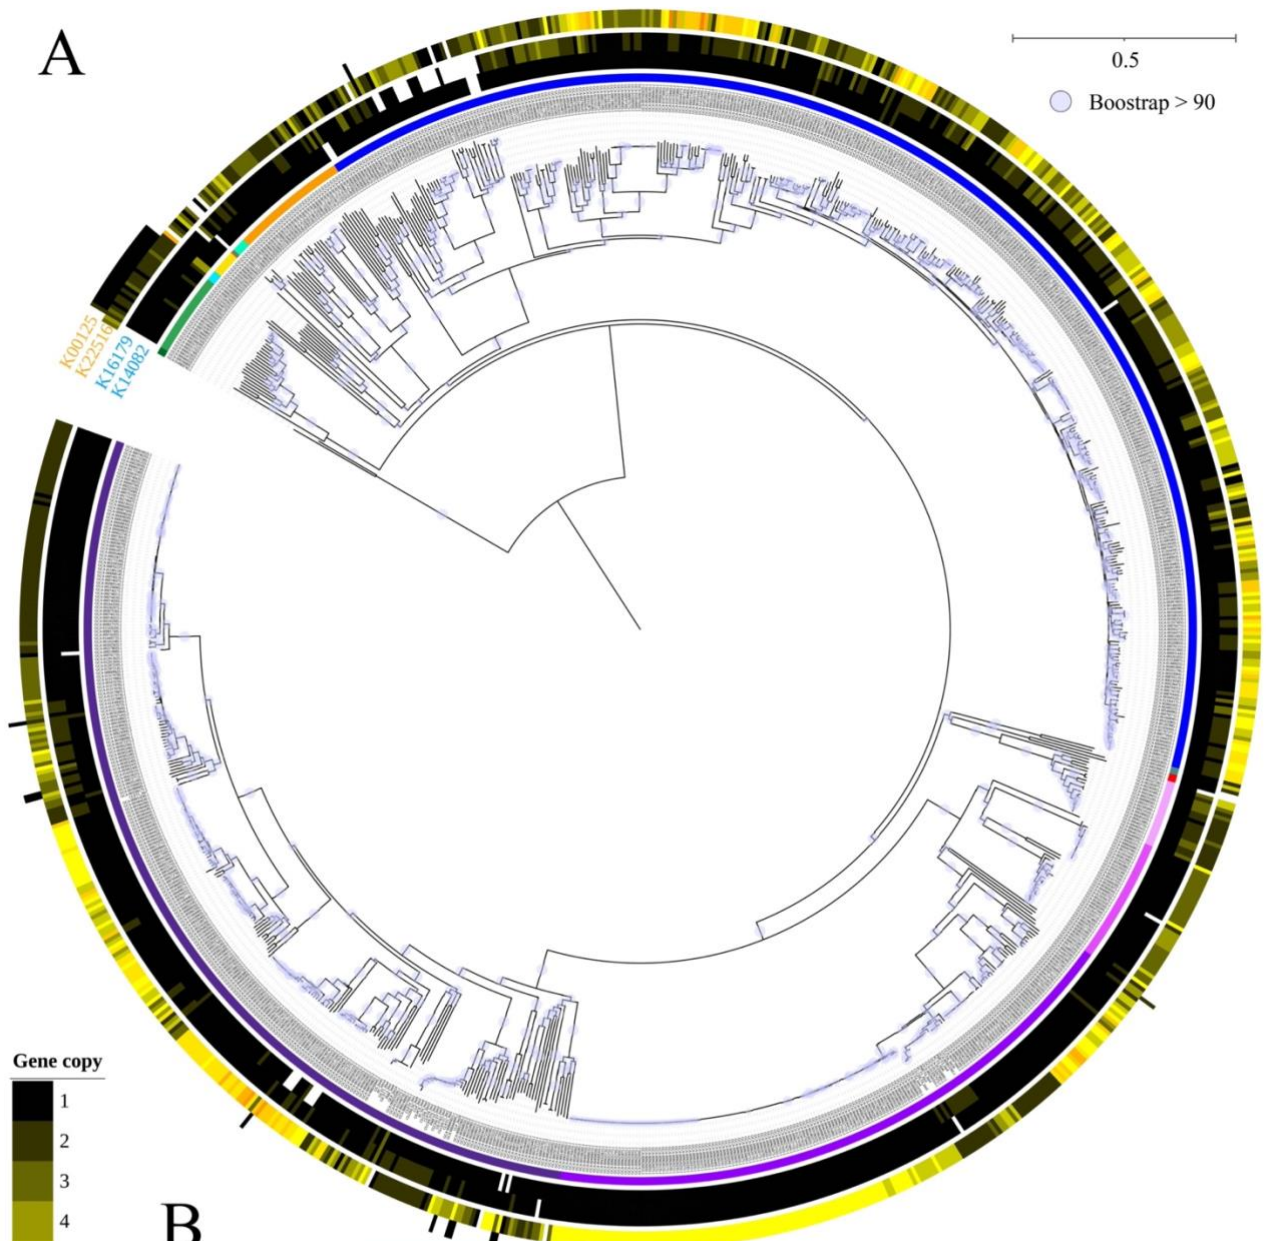

B

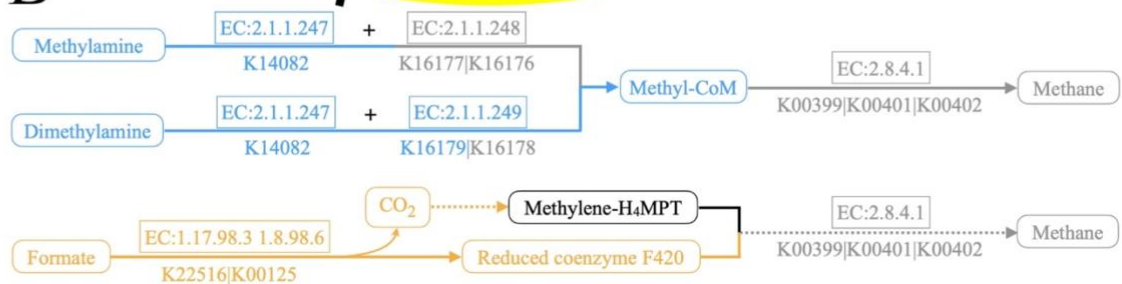

343

344 **Fig. 5** Methanogenesis potential of putative DMF degraders. A) Enzymes and genes involved in the  
 345 methanogenesis of dimethylamine (DMA), methylamine (MA), and formate (F); B) methanogenesis  
 346 pathways (DMA and MA: KEGG map00680; formate based on previously established pathways (63).  
 347 Squares indicate enzyme; rounded rectangles indicate metabolic intermediates. Line in light blue  
 348 indicates methylotrophic methanogenesis; line in orange indicates hydrogenotrophic methanogenesis;

349 line in grey indicates pathway without identified gene; line in black indicates not tested pathway;  
350 dotted line indicates multiple processes.

351

#### 352 **4. Discussion**

353 DMF is a refractory compound resistant to degradation, and until now, only a small number of  
354 bacterial isolates have been reported to degrade DMF under aerobic conditions. However, recent  
355 studies using 16S rRNA-based identification under both aerobic (26) and anaerobic conditions (23-25)  
356 suggest a much wider distribution of DMF degraders.

357 Our results indicate that a total of 4.5% of publicly available full prokaryotic genomes are  
358 putative DMF degraders and are far more widely distributed than previously known. Besides  
359 genomes in Proteobacteria, Actinobacteria, and Firmicutes phyla, putative DMF degraders are  
360 present in 8 other phyla, including two archaeal lineages. Knowledge, isolation and further  
361 characterization of these genomes would be particularly useful for developing biodegradation  
362 systems, either as pure culture or as enriched microbial consortia. DMF is miscible with water and the  
363 majority of organic solvents (1) and has been widely used as carrier solvent in enrichment or isolation  
364 of bacteria capable of degrading other water insoluble xenobiotic compounds. In this regard, our  
365 results further strengthen our recent statement that when isolating xenobiotic degraders, the presence  
366 of the carrier solvent should not be ignored (26). For instance, *Mesorhizobium tamadayense*  
367 MM3441 was initially enriched and isolated to degrade pyrene with DMF as the carrier solvent (22),  
368 however it is also able to degrade DMF. The 28 MAGs harboring genes encoding DMFase included  
369 in this study were also enriched to degrade other xenobiotic compounds in the presence of DMF  
370 (27). DMF should be cautiously used as carrier solvent for enriching microbial cultures to degrade  
371 other xenobiotic compounds due to it may result in the co-selection of other bacteria which are  
372 capable of utilizing DMF as substrates and/or the target xenobiotic compounds (22, 26).

373 Despite it is unclear when the HGT events occurred, horizontal acquisition of genes encoding  
374 DMFase via plasmids plays an important role in DMF degradation. However, the importance of HGT  
375 events differs between taxa. Although HGT of the DMFase is frequent in the order of Rhizobiales and  
376 the genus *Paracoccus* of  $\alpha$ -Proteobacteria, it was relatively rare in Cyanobacteria. Horizontal gene  
377 acquisition is important for and common in the order of Rhizobiales (64) and recognized as a major

378 driving force in the evolution of lifestyles in this order (65, 66). Likewise, HGT via plasmids is also  
379 considered as the driving force of *Paracoccus* evolution (54, 67). Our analyses on plasmid carriage  
380 further support the important role of plasmid in HGT occurred in *Paracoccus*, i.e., 19 out of 21  
381 complete *Paracoccus* genomes deposited in GenBank carry plasmid.

382 Most of the putative DMF degraders may result in the accumulation of MA intermediates for  
383 organisms metabolizing DMF via Pathway I because only around 6% of the DMF degraders have  
384 the potential to convert MA to HCHO. DMF degraders containing genes involved in MA  
385 degradation are primarily found in the genera *Paracoccus*, *Rhodococcus*, *Achromobacter*, and  
386 *Pseudomonas* (Fig. 1). These taxa could potentially mineralize DMF completely to CO<sub>2</sub> via Pathway  
387 I. DMF degraders without genes for MA degradation could still be useful for DMF degradation when  
388 used as part of amicrobial consortium/ mixed cultures. DMF degradation via Pathway II was thought  
389 to be less common (34), whereas the genes encoding the N-demethylase for the degradation of DMF  
390 and NMF via oxidative demethylations are not known. Therefore, we are not able at this point to  
391 evaluate the genomic diversity involved in the sequential oxidative demethylations of DMF in  
392 Pathway II. This knowledge gap requires identification of the N-demethylase genes involved in the  
393 sequential oxidative demethylation reactions. Nevertheless, among known bacterial DMF degraders,  
394 all tested isolates are capable of utilizing NMF as the sole carbon source (Table 1). Moreover, near  
395 30% of putative DMF degraders carry the gene for the degradation of FA (intermediate of Pathway  
396 II), and almost all contain the genes for the degradation of formate and HCHO (intermediates of both  
397 Pathways I and II). DMF degraders containing genes for FA degradation are distributed across  
398 multiple phyla, but primarily present in  $\alpha$ -,  $\beta$ -Proteobacteria and Actinobacteria classes, including  
399 *Rhodococcus* and *Paracoccus* genera. Most putative DMF degraders seem to be capable of growing  
400 anaerobically with nitrate as electron acceptor. However, Pathway III is incomplete because genes  
401 encoding methyl-CoM reductase as the last step of methanogenesis are absent. Individual taxa seem  
402 unlikely to complete the DMF methanogenic degradation with methane production, and other  
403 methanogens are required to complete the methanogenesis of hydrolyzed intermediates. Thus,  
404 microbial consortia have advantages by enabling co-metabolism and complementary enzymes in  
405 Pathway III. Recently, it was shown that the effective methanogenic degradation of DMF could not  
406 be maintained during the long-term operation of anaerobic membrane (23) and up-flow anaerobic

407 sludge blanket bioreactors (23, 29). Nitrate addition improves the performance of an anoxic  
408 denitrification reactor (18). Yet, it is not clear how nitrate would influence methane production.  
409 Nitrate dose is expected to play a key role for methanogenic degradation of DMF as heterotrophic  
410 denitrification takes over methanogenesis when  $C/N < 5$  (68), highlighting the need for further  
411 studies on the effect of nitrate on methanogenic degradation of DMF.

412

## 413 **5. Conclusions**

414 Taken together, our results reveal that 952 fully sequenced genomes harbor genes encoding  
415 DMFase, and are phylogenetically distributed across 11 phyla, substantially expanding the functional  
416 diversity in DMF degradation. Horizontal gene transfer via plasmids plays critical roles in DMF  
417 degradation for certain taxa, e.g., order Rhizobiales and genus *Paracoccus*. Although many members  
418 of *Paracoccus*, *Rhodococcus*, *Achromobacter*, and *Pseudomonas* genera appear to be able to  
419 potentially mineralize DMF completely via Pathway I under aerobic conditions, mixed microbial  
420 cultures probably are needed for DMF degradation particularly via Pathway III, where methanogens  
421 are required to complete the methanogenesis of DMF degradation intermediates. This study provides  
422 in-depth information on genome-scale metabolic pathways in DMF degradation and their  
423 phylogenetic distribution.

424

## 425 **Declaration of Competing Interest**

426 The authors declare no conflict of interest.

427

## 428 **Acknowledgements**

429 This work was supported by the National Natural Science Foundation of China (Grant Nos.  
430 51409106, U1901601) and the University of Macau Multi-Year Research Grant  
431 (MYRG2018-00108-FST).

432

433 **Reference**

- 434 1. HSDB. 2015. Hazardous Substance Data Base. Bethesda (MD), USA: United States National  
435 Library of Medicine. Available from: <http://toxnet.nlm.nih.gov/cgi-bin/sis/htmlgen?HSDB>.
- 436 2. IARC. 2018. **Some Industrial Chemicals**. In Humans IWGotEoCRt (ed), IARC  
437 Monographs on the Evaluation of Carcinogenic Risks to Humans, vol 11, Lyon (FR).
- 438 3. Johnson W, Yagi K. 2002. CEH report: dimethylformamide. SRI Consulting, Menlo Park,  
439 CA.
- 440 4. CM. 2020. Cheshire Media. Available from:  
441 [https://cheshire.media/uncategorised/318683/nn-dimethylformamide-market-to-eyewitness-](https://cheshire.media/uncategorised/318683/nn-dimethylformamide-market-to-eyewitness-massive-growth-by-2028-basf-dupont-eastman-chemical-merck-luxi-chemical/)  
442 [massive-growth-by-2028-basf-dupont-eastman-chemical-merck-luxi-chemical/](https://cheshire.media/uncategorised/318683/nn-dimethylformamide-market-to-eyewitness-massive-growth-by-2028-basf-dupont-eastman-chemical-merck-luxi-chemical/).
- 443 5. JMOE. 2018. Japan Ministry of Environment. PRTR Information Plaza Japan (accessed  
444 12.01.2020). <https://www.env.go.jp/en/chemi/prtr/prtr.html>.
- 445 6. Kim TH, Kim SG. 2011. Clinical Outcomes of Occupational Exposure to  
446 N,N-Dimethylformamide: Perspectives from Experimental Toxicology. *Safety and Health at*  
447 *Work* 2:97-104.
- 448 7. Hu Z-Y, Chang J, Guo F-F, Deng H-Y, Pan G-T, Li B-Y, Zhang Z-L. 2020. The effects of  
449 dimethylformamide exposure on liver and kidney function in the elderly population: A  
450 cross-sectional study. *Medicine* 99:e20749-e20749.
- 451 8. Zhao Y, Ma L, Chang W, Huang Z, Feng X, Qi X, Li Z. 2018. Efficient photocatalytic  
452 degradation of gaseous N,N-dimethylformamide in tannery waste gas using doubly  
453 open-ended Ag/TiO<sub>2</sub> nanotube array membranes. *Applied Surface Science* 444:610-620.
- 454 9. Chang C-P, Chen J-N, Lu M-C, Yang H-Y. 2005. Photocatalytic oxidation of gaseous DMF  
455 using thin film TiO<sub>2</sub> photocatalyst. *Chemosphere* 58:1071-1078.
- 456 10. Sang W, Cui J, Mei L, Zhang Q, Li Y, Li D, Zhang W, Li Z. 2019. Degradation of liquid  
457 phase N,N-dimethylformamide by dielectric barrier discharge plasma: Mechanism and  
458 degradation pathways. *Chemosphere* 236:124401.
- 459 11. Sun G, Xu A, He Y, Yang M, Du H, Sun C. 2008. Ruthenium catalysts supported on  
460 high-surface-area zirconia for the catalytic wet oxidation of N,N-dimethyl formamide.  
461 *Journal of Hazardous Materials* 156:335-341.
- 462 12. Gong J, Li D, Wang L, Zhan W, Guo Y, Wang Y, Guo Y. 2019. Catalytic wet oxidation of  
463 N,N-dimethyl formamide over ruthenium supported on CeO<sub>2</sub> and Ce<sub>0.7</sub>Zr<sub>0.3</sub>O<sub>2</sub> catalysts.  
464 *Journal of Rare Earths* 37:265-272.
- 465 13. Liu F, Gao Y, Zhang S, Yan X, Fan F, Zhao C, Sun J. 2016. Application of mesoporous  
466 carbon and modified mesoporous carbon for treatment of DMF sewage. *Journal of*  
467 *Nanoparticle Research* 18:38.
- 468 14. Tsai WT, Chang CY, Lee HC. 1996. Adsorption of organic vapors containing  
469 N,N-dimethylformamide on activated carbon and hydrophobic zeolite. *Journal of*  
470 *Environmental Science and Health Part A: Environmental Science and Engineering and*  
471 *Toxicology* 31:995-1008.
- 472 15. Das S, K. Banthia A, Adhikari B. 2006. Pervaporation separation of DMF from water using a  
473 crosslinked polyurethane urea-PMMA IPN membrane. *Desalination* 197:106-116.
- 474 16. Kahya S, Şanlı O. 2014. Separation of dimethylformamide/water mixtures through sodium  
475 alginate and sodium alginate/clinoptilolite composite membranes by vapor permeation with



- 476 and without feed-membrane temperature difference. *Desalination and Water Treatment*  
477 52:3517-3525.
- 478 17. Dou P, Song J, Zhao S, Xu S, Li X, He T. 2019. Novel low cost hybrid  
479 extraction-distillation-reverse osmosis process for complete removal of  
480 N,N-dimethylformamide from industrial wastewater. *Process Safety and Environmental*  
481 *Protection* 130:317-325.
- 482 18. Wang J, Liu X, Jiang X, Zhang L, Hou C, Su G, Wang L, Mu Y, Shen J. 2020. Facilitated  
483 bio-mineralization of N, N-dimethylformamide in anoxic denitrification system: Long-term  
484 performance and biological mechanism. *Water Research* 186:116306.
- 485 19. Zhou X, Jin W, Sun C, Gao S-H, Chen C, Wang Q, Han S-F, Tu R, Latif MA, Wang Q. 2018.  
486 Microbial degradation of N,N-dimethylformamide by *Paracoccus* sp. strain DMF-3 from  
487 activated sludge. *Chemical Engineering Journal* 343:324-330.
- 488 20. Swaroop S, Sughosh P, Ramanathan G. 2009. Biomineralization of N,N-dimethylformamide  
489 by *Paracoccus* sp. strain DMF. *Journal of Hazardous Materials* 171:268-272.
- 490 21. Veeranagouda Y, Emmanuel Paul PV, Gorla P, Siddavattam D, Karegoudar TB. 2006.  
491 Complete mineralisation of dimethylformamide by *Ochrobactrum* sp. DGVK1 isolated from  
492 the soil samples collected from the coalmine leftovers. *Applied Microbiology and*  
493 *Biotechnology* 71:369-375.
- 494 22. Dhar K, Subashchandrabose SR, Venkateswarlu K, Megharaj M. 2020. *Mesorhizobium*  
495 *tamadayense* MM3441: A novel methylotroph with a great potential in degrading N,  
496 N'-dimethylformamide. *International Biodeterioration & Biodegradation* 153:105045.
- 497 23. Li L, Kong Z, Xue Y, Wang T, Kato H, Li Y-Y. 2020. A comparative long-term operation  
498 using up-flow anaerobic sludge blanket (UASB) and anaerobic membrane bioreactor  
499 (AnMBR) for the upgrading of anaerobic treatment of N, N-dimethylformamide-containing  
500 wastewater. *Science of The Total Environment* 699:134370.
- 501 24. Kong Z, Li L, Wu J, Zhang T, Li Y-Y. 2019. Insights into the methanogenic degradation of N,  
502 N-dimethylformamide: The functional microorganisms and their ecological relationships.  
503 *Bioresource Technology* 271:37-47.
- 504 25. Kong Z, Li L, Kurihara R, Kubota K, Li Y-Y. 2018. Anaerobic treatment of N,  
505 N-dimethylformamide-containing wastewater by co-culturing two sources of inoculum.  
506 *Water Research* 139:228-239.
- 507 26. Li J, Wu C, Chen S, Lu Q, Shim H, Huang X, Jia C, Wang S. 2020. Enriching indigenous  
508 microbial consortia as a promising strategy for xenobiotics' cleanup. *Journal of Cleaner*  
509 *Production* 261:121234.
- 510 27. Li J, Jia C, Lu Q, Hungate BA, Dijkstra P, Wang S, Wu C, Chen S, Li D, Shim H. 2021.  
511 Mechanistic insights into the success of xenobiotic degraders resolved from metagenomes of  
512 microbial enrichment cultures. bioRxiv doi:10.1101/2021.03.03.433815:2021.03.03.433815.
- 513 28. Bromley-Challenor KCA, Caggiano N, Knapp JS. 2000. Bacterial growth on  
514 N,N-dimethylformamide: implications for the biotreatment of industrial wastewater. *Journal*  
515 *of Industrial Microbiology and Biotechnology* 25:8-16.
- 516 29. Kong Z, Li L, Wang T, Rong C, Xue Y, Zhang T, Wu J, Li Y-Y. 2020. New insights into the  
517 cultivation of N, N-dimethylformamide-degrading methanogenic consortium: A long-term  
518 investigation on the variation of prokaryotic community inoculated with activated sludge.  
519 *Environmental Research* 182:109060.

- 520 30. Czarnecki J, Dziewit L, Puzyna M, Prochwicz E, Tudek A, Wibberg D, Schlüter A, Pühler A,  
521 Bartosik D. 2017. Lifestyle-determining extrachromosomal replicon pAMV1 and its  
522 contribution to the carbon metabolism of the methylotrophic bacterium *Paracoccus*  
523 *aminovorans* JCM 7685. *Environmental Microbiology* 19:4536-4550.
- 524 31. Dziewit L, Dmowski M, Baj J, Bartosik D. 2010. Plasmid pAMI2 of *Paracoccus aminophilus*  
525 JCM 7686 carries N,N-dimethylformamide degradation-related genes whose expression is  
526 activated by a LuxR family regulator. *Applied and Environmental Microbiology* 76:1861.
- 527 32. Lu X, Wang W, Zhang L, Hu H, Xu P, Wei T, Tang H. 2019. Molecular Mechanism of  
528 N,N-Dimethylformamide Degradation in *Methylobacterium* sp. Strain DM1. *Applied and*  
529 *environmental microbiology* 85:e00275-19.
- 530 33. Hyatt D, Chen G-L, Locascio PF, Land ML, Larimer FW, Hauser LJ. 2010. Prodigal:  
531 prokaryotic gene recognition and translation initiation site identification. *BMC*  
532 *bioinformatics* 11:119-119.
- 533 34. Ghisalba O, Cevey P, Küenzi M, Schär H-P. 1985. Biodegradation of chemical waste by  
534 specialized methylotrophs, an alternative to physical methods of waste disposal. *Conservation*  
535 *& Recycling* 8:47-71.
- 536 35. Aramaki T, Blanc-Mathieu R, Endo H, Ohkubo K, Kanehisa M, Goto S, Ogata H. 2020.  
537 KofamKOALA: KEGG Ortholog assignment based on profile HMM and adaptive score  
538 threshold. *Bioinformatics* 36:2251-2252.
- 539 36. Finn RD, Clements J, Eddy SR. 2011. HMMER web server: interactive sequence similarity  
540 searching. *Nucleic Acids Research* 39:W29-W37.
- 541 37. Schwengers O, Barth P, Falgenhauer L, Hain T, Chakraborty T, Goesmann A. 2020. Platon:  
542 identification and characterization of bacterial plasmid contigs in short-read draft assemblies  
543 exploiting protein-sequence-based replicon distribution scores. *bioRxiv*  
544 doi:10.1101/2020.04.21.053082:2020.04.21.053082.
- 545 38. Wu D, Jospin G, Eisen JA. 2013. Systematic identification of gene families for use as  
546 "markers" for phylogenetic and phylogeny-driven ecological studies of bacteria and archaea  
547 and their major subgroups. *PLOS ONE* 8:e77033.
- 548 39. Mende DR, Sunagawa S, Zeller G, Bork P. 2013. Accurate and universal delineation of  
549 prokaryotic species. *Nature Methods* 10:881-884.
- 550 40. Sievers F, Wilm A, Dineen D, Gibson TJ, Karplus K, Li W, Lopez R, McWilliam H,  
551 Remmert M, Söding J, Thompson JD, Higgins DG. 2011. Fast, scalable generation of  
552 high-quality protein multiple sequence alignments using Clustal Omega. *Molecular Systems*  
553 *Biology* 7:539-539.
- 554 41. Capella-Gutiérrez S, Silla-Martínez JM, Gabaldón T. 2009. trimAl: a tool for automated  
555 alignment trimming in large-scale phylogenetic analyses. *Bioinformatics (Oxford, England)*  
556 25:1972-1973.
- 557 42. Letunic I, Bork P. 2016. Interactive tree of life (iTOL) v3: an online tool for the display and  
558 annotation of phylogenetic and other trees. *Nucleic Acids Research* 44:W242-W245.
- 559 43. Urakami T, Kobayashi H, Araki H. 1990. Isolation and identification of  
560 N,N-Dimethylformamide-biodegrading bacteria. *Journal of Fermentation and*  
561 *Bioengineering* 70:45-47.
- 562 44. Vidhya R, Thatheyus A. 2013. Biodegradation of dimethylformamide using *Bacillus subtilis*.  
563 *Am J Microbiol Res* 1:10-15.

- 564 45. Okazaki M, Hamada T, Fujii H, Kusudo O, Mizobe A, Matsuzawa S. 1995. Development of  
565 poly(vinyl alcohol) hydrogel for waste water cleaning. II. Treatment of  
566 N,N-dimethylformamide in waste water with poly(vinyl alcohol) gel with immobilized  
567 microorganisms. *Journal of Applied Polymer Science* 58:2243-2249.
- 568 46. Urakami T, Araki H, Oyanagi H, Suzuki K-I, Komagata K. 1990. *Paracoccus aminophilus* sp.  
569 nov. and *Paracoccus aminovorans* sp. nov., which utilize N,N-dimethylformamide. *Int J Syst*  
570 *Bacteriol* 40:287-291.
- 571 47. Dziejewicz L, Czarnecki J, Prochwicz E, Wibberg D, Schlüter A, Pühler A, Bartosik D. 2015.  
572 Genome-guided insight into the methylotrophy of *Paracoccus aminophilus* JCM 7686.  
573 *Frontiers in Microbiology* 6:852.
- 574 48. Kong Z, Li L, Kurihara R, Zhang T, Li Y-Y. 2019. Anaerobic treatment of N,  
575 N-dimethylformamide-containing high-strength wastewater by submerged anaerobic  
576 membrane bioreactor with a co-cultured inoculum. *Science of The Total Environment*  
577 663:696-708.
- 578 49. Kong Z, Li L, Li Y-Y. 2019. Long-term performance of UASB in treating N,  
579 N-dimethylformamide-containing wastewater with a rapid start-up by inoculating mixed  
580 sludge. *Science of The Total Environment* 648:1141-1150.
- 581 50. Kong Z, Li L, Li Y-Y. 2018. Characterization and variation of microbial community structure  
582 during the anaerobic treatment of N, N-dimethylformamide-containing wastewater by UASB  
583 with artificially mixed consortium. *Bioresource Technology* 268:434-444.
- 584 51. Hippe H, Caspari D, Fiebig K, Gottschalk G. 1979. Utilization of trimethylamine and other  
585 N-methyl compounds for growth and methane formation by *Methanosarcina barkeri*.  
586 *Proceedings of the National Academy of Sciences of the United States of America*  
587 76:494-498.
- 588 52. Kurth JM, Op den Camp HJM, Welte CU. 2020. Several ways one goal—methanogenesis  
589 from unconventional substrates. *Applied Microbiology and Biotechnology* 104:6839-6854.
- 590 53. Dziejewicz L, Kuczkowska K, Adamczuk M, Radlinska M, Bartosik D. 2011. Functional  
591 characterization of the type II PamiI restriction-modification system derived from plasmid  
592 pAMI7 of *Paracoccus aminophilus* JCM 7686. *FEMS Microbiology Letters* 324:56-63.
- 593 54. Dziejewicz L, Czarnecki J, Wibberg D, Radlinska M, Mrozek P, Szymczak M, Schlüter A,  
594 Pühler A, Bartosik D. 2014. Architecture and functions of a multipartite genome of the  
595 methylotrophic bacterium *Paracoccus aminophilus* JCM 7686, containing primary and  
596 secondary chromids. *BMC Genomics* 15:124.
- 597 55. Siddavattam D, Karegoudar TB, Mudde SK, Kumar N, Baddam R, Avasthi TS, Ahmed N.  
598 2011. Genome of a novel isolate of *Paracoccus denitrificans* capable of degrading  
599 N,N-dimethylformamide. *Journal of Bacteriology* 193:5598.
- 600 56. Sanjeevkumar S, Nayak AS, Santoshkumar M, Siddavattam D, Karegoudar TB. 2013.  
601 *Paracoccus denitrificans* SD1 mediated augmentation with indigenous mixed cultures for  
602 enhanced removal of N,N-dimethylformamide from industrial effluents. *Biochemical*  
603 *Engineering Journal* 79:1-6.
- 604 57. Zheng Y, Chen D, Li N, Xu Q, Li H, He J, Lu J. 2016. Efficient simultaneous  
605 adsorption-biodegradation of high-concentrated N,N-dimethylformamide from water by  
606 *Paracoccus denitrificans*-graphene oxide microcomposites. *Scientific Reports* 6:20003.

- 607 58. Nisha KN, Devi V, Varalakshmi P, Ashokkumar B. 2015. Biodegradation and utilization of  
608 dimethylformamide by biofilm forming *Paracoccus* sp. strains MKU1 and MKU2.  
609 *Bioresource Technology* 188:9-13.
- 610 59. Kumar SS, Kumar MS, Siddavattam D, Karegoudar T. 2012. Generation of continuous  
611 packed bed reactor with PVA–alginate blend immobilized *Ochrobactrum* sp. DGVK1 cells  
612 for effective removal of N, N-dimethylformamide from industrial effluents. *Journal of*  
613 *hazardous materials* 199:58-63.
- 614 60. Hasegawa Y, Matsuo M, Sigemoto Y, Sakai T, Tokuyama T. 1997. Purification and  
615 characterization of N, N-dimethylformamidase from *Alcaligenes* sp. KUFA-1. *Journal of*  
616 *fermentation and bioengineering* 84:543-547.
- 617 61. Yang S, Chen L, Gu H, Cai T. 2011. Isolation, identification and degradation characteristics  
618 of a DMF-degrading bacterial MBYD-1. *China Environmental Science* 31:437-442.
- 619 62. Koonin EV, Makarova KS, Aravind L. 2001. Horizontal Gene Transfer in Prokaryotes:  
620 Quantification and Classification. *Annual Review of Microbiology* 55:709-742.
- 621 63. Costa KC, Wong PM, Wang T, Lie TJ, Dodsworth JA, Swanson I, Burn JA, Hackett M, Leigh  
622 JA. 2010. Protein complexing in a methanogen suggests electron bifurcation and electron  
623 delivery from formate to heterodisulfide reductase. *Proceedings of the National Academy of*  
624 *Sciences* 107:11050.
- 625 64. Wang S, Meade A, Lam H-M, Luo H. 2020. Evolutionary Timeline and Genomic Plasticity  
626 Underlying the Lifestyle Diversity in Rhizobiales. *mSystems* 5:e00438-20.
- 627 65. Garrido-Oter R, Nakano RT, Dombrowski N, Ma K-W, McHardy AC, Schulze-Lefert P.  
628 2018. Modular Traits of the Rhizobiales Root Microbiota and Their Evolutionary  
629 Relationship with Symbiotic Rhizobia. *Cell Host & Microbe* 24:155-167.e5.
- 630 66. Carvalho FM, Souza RC, Barcellos FG, Hungria M, Vasconcelos ATR. 2010. Genomic and  
631 evolutionary comparisons of diazotrophic and pathogenic bacteria of the order Rhizobiales.  
632 *BMC Microbiology* 10:37.
- 633 67. Dziewit L, Baj J, Szuplewska M, Maj A, Tabin M, Czyzkowska A, Skrzypczyk G, Adamczuk  
634 M, Sitarek T, Stawinski P, Tudek A, Wanasz K, Wardal E, Piechucka E, Bartosik D. 2012.  
635 Insights into the Transposable Mobilome of *Paracoccus* spp. (Alphaproteobacteria). *PLOS*  
636 *ONE* 7:e32277.
- 637 68. Sun Y, Zhao J, Chen L, Liu Y, Zuo J. 2018. Methanogenic community structure in  
638 simultaneous methanogenesis and denitrification granular sludge. *Frontiers of Environmental*  
639 *Science & Engineering* 12:10.
- 640
